# Supplementary material for: Climatic variability in Princess Elizabeth Land (East Antarctica) overthe last 350 years
Source: Copernicus journal article supplement (doi:10.5194/cp-2016-76), 2016-07-08
Supplement: Supplementary file 1 [file PEL data.xls]

## Sheet: individual isotopic records
Year AD	VRS2013	105 km	NVFL-1	PV-10	NVFL-3	400 km			Individual dD series used to construct the stacked isotopic record for the Princess Elisabeth Land
									See Figure 2 in the paper
1654	-455.304					-314.921
1655	-454.638					-314.649
1656	-453.972					-315.937
1657	-453.307					-317.225
1658	-452.641					-318.513
1659	-451.975					-319.802
1660	-451.309					-321.09
1661	-450.643					-319.552
1662	-449.98					-317.97
1663	-449.321					-316.387
1664	-448.661					-314.804
1665	-448.002					-313.222
1666	-447.342					-313.529
1667	-446.682					-314.246
1668	-446.023					-314.963
1669	-445.363					-315.68
1670	-444.704					-316.397
1671	-444.288					-316.494
1672	-445.006					-316.294
1673	-445.723					-316.093
1674	-446.441					-315.892
1675	-447.158					-315.692
1676	-447.876					-316.113
1677	-448.593					-317.055
1678	-449.311					-317.998
1679	-450.028					-318.94
1680	-450.746					-319.882
1681	-451.299					-320.293
1682	-451.814					-319.997
1683	-452.329					-319.7
1684	-452.844					-319.404
1685	-453.359					-319.108
1686	-453.874					-318.655
1687	-454.389					-317.886
1688	-454.904					-317.117
1689	-455.418					-316.347
1690	-455.316					-315.578
1691	-454.441					-315.085
1692	-453.566					-315.427
1693	-452.691					-315.768
1694	-451.816					-316.11
1695	-450.941					-316.451
1696	-450.066					-317.037
1697	-449.191					-318.701
1698	-448.316					-320.365
1699	-447.42					-322.029
1700	-446.275					-323.693
1701	-445.129					-324.732
1702	-443.984					-321.814
1703	-442.839					-318.895
1704	-441.693					-315.977
1705	-440.548					-313.059
1706	-439.403					-310.423
1707	-438.257					-310.163
1708	-437.112					-309.904
1709	-437.03					-309.644
1710	-437.38					-309.385
1711	-437.73		-434.613			-309.197
1712	-438.079		-440.221			-309.704
1713	-438.429		-442.818			-310.21
1714	-438.779		-444.117			-310.717
1715	-439.129		-424.313			-311.223
1716	-439.479		-421.935			-311.698
1717	-439.828		-417.178			-311.881
1718	-440.056		-418.344			-312.064
1719	-440.049		-418.927			-312.247
1720	-440.043		-408.993			-312.429
1721	-440.036		-407.087			-312.887
1722	-451.986		-403.275			-315.33
1723	-450.984		-416.727			-317.772
1724	-449.981		-423.452			-320.214
1725	-448.979		-431.411			-322.657
1726	-447.976		-430.224			-324.064
1727	-446.974		-427.849			-320.173
1728	-446.279		-428.269			-316.282
1729	-445.59		-428.479			-312.391
1730	-444.902		-438.517			-308.5
1731	-444.218		-436.23			-305.599
1732	-444.127		-431.657			-306.129
1733	-444.036		-413.875			-306.66
1734	-443.944		-404.985			-307.19
1735	-443.853		-419.679			-307.72
1736	-443.762		-420.003			-308.558
1737	-443.369		-420.65			-310.103
1738	-442.784		-424.895			-311.647
1739	-442.199		-427.018			-313.192
1740	-441.615		-423.224			-314.736
1741	-441.03		-417.445			-315.692
1742	-440.445		-405.885			-315.772
1743	-439.861		-410.637			-315.852
1744	-439.659		-416.225			-315.932
1745	-439.973		-435.497			-316.012
1746	-440.288		-434.049			-315.102
1747	-440.606		-432.601			-313.28
1748	-440.925		-424.318			-311.458
1749	-441.243		-421.956			-309.635
1750	-434.844		-418.428			-307.813
1751	-434.729		-420.458			-306.812
1752	-436.433		-422.489			-306.238
1753	-436.636		-436.634			-305.664
1754	-446.745		-438.345			-305.09
1755	-441.265		-437.053			-304.516
1756	-445.169		-432.271			-306.295
1757	-447.237	-227.124	-429.88			-308.606
1758	-447.94	-220.655	-440.739			-310.916
1759	-446.996	-217.906	-440.249			-313.227
1760	-445.442	-229.381	-439.268			-315.537
1761	-444.193	-235.005	-435.59			-316.662
1762	-441.881	-223.109	-433.735			-317.781
1763	-442.22	-219.023	-431.813			-318.899
1764	-443.559	-220.871	-435.587			-320.018
1765	-443.431	-219.3	-439.362			-320.9
1766	-447.265	-216.227	-440.784			-320.798
1767	-439.232	-225.446	-435.269			-320.695
1768	-440.102	-230.975	-423.765			-320.593
1769	-445.16	-231.076	-429.19			-320.49
1770	-446.312	-227.037	-431.902			-321.184
1771	-445.878	-223.702	-436.269			-323.01
1772	-446.145	-234.393	-427.725			-324.836
1773	-442.752	-228.87	-416.333			-326.662
1774	-444.222	-237.948	-431.541			-328.488
1775	-447.593	-221.959	-433.991			-326.308
1776	-446.642	-227.731	-431.034			-322.009
1777	-449.983	-220.017	-430.484			-317.709
1778	-445.754	-223.471	-430.374			-313.41
1779	-445.531	-230.548	-437.779			-309.11
1780	-443.066	-237.012	-437.544			-308.746
1781	-443.375	-234.757	-437.231			-308.742
1782	-442.565	-222.976	-426.149			-308.738
1783	-440.009	-221.271	-427.512			-308.733
1784	-440.65	-221.772	-445.41			-309.432
1785	-443.085	-223.175	-436.419			-312.941
1786	-435.772	-226.161	-431.923			-316.45
1787	-438.107	-232.665	-434.599			-319.958
1788	-437.141	-228.885	-439.509			-323.467
1789	-439.887	-227.341	-446.056			-325.417
1790	-441.045	-233.188	-441.917			-325.845
1791	-440.991	-222.879	-438.782			-326.273
1792	-440.684	-225.939	-433.013			-326.701
1793	-441.453	-232.578	-431.839			-327.129
1794	-441.662	-227.813	-431.029			-325.269
1795	-443.526	-217.271	-429.692			-322.955
1796	-444.759	-232.901	-433.001			-320.641
1797	-447.336	-221.664	-436.311			-318.326
1798	-445.357	-215.236	-423.661			-316.411
1799	-444.36	-212.775	-425.292			-316.253
1800	-447.725	-222.658	-428.555			-316.095
1801	-454.743	-222.132	-427.586			-315.937
1802	-450.166	-215.615	-429.041			-315.78
1803	-449.873	-229.262	-437.283			-316.758
1804	-451.858	-231.939	-428.448			-318.635
1805	-453.84	-228.95	-424.031			-320.512
1806	-451.53	-237.684	-412.176			-322.388
1807	-449.59	-225.711	-410.456			-324.265
1808	-449.432	-228.823	-408.735			-323.549
1809	-450.102	-228.344	-426.607			-322.711
1810	-452.063	-223.565	-427.171			-321.873
1811	-451.005	-225.017	-428.299			-321.034
1812	-450.715	-226.774	-429.662			-320.795
1813	-446.24	-226.192	-427.937			-321.557
1814	-441.266	-219.619	-422.943			-322.318
1815	-446.731	-225.801	-421.965			-323.08
1816	-443.538	-237.997	-424.472			-323.841
1817	-444.281	-227.985	-438.959			-324.808
1818	-447.845	-216.383	-438.097			-325.821
1819	-450.925	-203.976	-438.203			-326.834
1820	-446.083	-204.005	-441.42			-327.846
1821	-439.844	-228.647	-440.943			-326.966
1822	-441.247	-236.419	-440.466			-321.341
1823	-442.834	-222.066	-432.305			-315.716
1824	-446.27	-218.767	-431.687			-310.091
1825	-443.524	-224.169	-430.863			-304.466
1826	-446.037	-205.103	-431.522			-302.315
1827	-444.952	-220.002	-430.68			-301.162
1828	-437.77	-219.733	-429.41			-300.009
1829	-438.729	-221.688	-429.674			-298.856
1830	-437.911	-218.54	-432.941			-299.309
1831	-437.379	-212.249	-439.386			-303.648
1832	-439.128	-216.529	-427.085			-307.987
1833	-437.236	-221.584	-425.436			-312.326
1834	-439.044	-222.739	-427.466			-316.664
1835	-443.515	-219.753	-428.054			-316.444
1836	-446.117	-219.592	-425.7			-315.307
1837	-450.662	-215.566	-419.23			-314.171
1838	-453.755	-210.615	-422.934			-313.034
1839	-451.139	-230.124	-425.906			-313.817
1840	-453.307	-237.93	-433.357			-317.502
1841	-450.152	-244.272	-430.839			-321.188
1842	-451.491	-244.02	-431.534			-324.873
1843	-449.432	-219.746	-440.046			-328.558
1844	-447.022	-219.585	-447.856			-328.499
1845	-442.324	-221.034	-452.917			-328.396
1846	-443.406	-213.441	-462.601			-328.293
1847	-448.072	-226.488	-454.393			-328.191
1848	-449.272	-230.216	-449.399			-327.753
1849	-449.451	-229.483	-440.841			-327.097
1850	-448.384	-226.533	-430.66			-326.441
1851	-447.767	-228.654	-422.322			-325.785
1852	-446.332	-224.753	-400.999			-324.683
1853	-444.012	-217.788	-412.038			-322.218
1854	-448.626	-223.713	-418.911			-319.752
1855	-447.061	-214.812	-431.2			-317.287
1856	-453.633	-211.48	-432.182			-314.822
1857	-446.235	-211.818	-432.806			-315.622
1858	-446.34	-223.397	-433.382			-316.73
1859	-444.174	-210.21	-435.142			-317.838
1860	-440.793	-209.614	-432.236			-318.946
1861	-441.491	-202.507	-423.211			-319.367
1862	-436.158	-186.993	-412.37			-319.346
1863	-437.522	-215.138	-408.912			-319.325
1864	-440.29	-217.315	-405.609			-319.304
1865	-444.937	-220.152	-425.334			-318.893
1866	-446.466	-228.374	-436.193			-317.685
1867	-446.897	-219.903	-446.289			-316.476
1868	-445.823	-210.569	-445.6			-315.268
1869	-442.083	-216.808	-439.016			-313.854
1870	-443.721	-213.964	-432.432			-309.919
1871	-439.2	-205.37	-429.132			-305.984
1872	-441.095	-220.782	-428.019			-302.049
1873	-445.243	-227.347	-427.784			-298.113
1874	-441.141	-221.345	-431.38			-301.164
1875	-444.728	-235.38	-433.258			-305.456
1876	-440.673	-234.376	-431.157			-309.748
1877	-442.657	-214.034	-424.024			-314.04
1878	-443.059	-216.463	-421.195			-317.118
1879	-439.243	-205.466	-418.308			-319.544
1880	-442.235	-224.99	-412.503			-321.97
1881	-435.59	-235.6	-441.328			-324.396
1882	-431.69	-223.479	-445.057			-324.591
1883	-435.189	-230.489	-443.623			-322.358
1884	-437.97	-222.603	-424.048			-320.126
1885	-438.521	-225.783	-420.277			-317.894
1886	-441.444	-223.503	-420.135			-316.719
1887	-436.29	-226.444	-436.256			-317.64
1888	-441.244	-220.654	-436.814			-318.561
1889	-439.193	-216.372	-437.47			-319.481
1890	-435.856	-235.892	-438.55			-319.206
1891	-437.382	-240.056	-428.197			-314.68
1892	-440.275	-225.502	-426.5			-310.154
1893	-440.931	-222.82	-426.423			-305.628
1894	-442.202	-220.138	-433.597			-301.733
1895	-444.093	-207.392	-420.208			-301.982
1896	-447.748	-223.169	-414.852			-302.23
1897	-446.681	-229.924	-413.579			-302.479
1898	-448.067	-245.637	-412.305			-302.709
1899	-448.958	-226.98	-414.75			-302.694
1900	-448.261	-223.971	-418.704			-302.679
1901	-449.401	-221.613	-427.761			-302.664
1902	-451.781	-229.235	-429.057			-302.709
1903	-449.946	-225.266	-430.353			-304.119
1904	-456.551	-224.732	-431.648			-305.528
1905	-455.242	-229.869	-438.567			-306.937
1906	-450.567	-233.615	-442.608			-308.214
1907	-448.624	-229.743	-447.973			-306.316
1908	-446.177	-221.509	-461.98			-304.418
1909	-441.47	-242.198	-452.052			-302.52
1910	-440.57	-235.384	-441.445			-300.955
1911	-438.256	-222.718	-429.51			-303.993
1912	-434.871	-220.84	-436.594			-307.031
1913	-427.415	-218.817	-433.822			-310.068
1914	-430.098	-232.526	-435.117			-312.869
1915	-434.242	-220.526	-441.126			-313.993
1916	-437.728	-226.283	-449.797			-315.117
1917	-438.181	-242.993	-445.427			-316.242
1918	-438.159	-240.15	-439.478			-316.685
1919	-434.629	-237.225	-431.466			-314.561
1920	-440.951	-215.798	-415.193			-312.437
1921	-443.052	-218.728	-417.46			-310.313
1922	-443.271	-221.087	-418.089			-309.099
1923	-443.351	-206.197	-409.643			-309.774
1924	-444.143	-222.332	-396.419			-310.448
1925	-442.545	-220.561	-385.463			-311.123
1926	-438.318	-221.94	-384.114			-311.211
1927	-433.814	-215.61	-416.815			-310.638
1928	-427.436	-231.455	-425.851			-310.065
1929	-427.988	-219.092	-426.53			-309.493
1930	-431.076	-212.767	-427.883			-310.216
1931	-432.198	-225.484	-433.318			-311.649
1932	-441.452	-228.612	-434.887			-313.083
1933	-442.601	-226.626	-434.131			-314.517
1934	-448.084	-230.401	-432.009			-313.373
1935	-449.594	-230.09	-427.853			-311.779
1936	-444.017	-244.834	-429.035			-310.185
1937	-441.577	-241.469	-429.626			-308.727
1938	-433.871	-224.124	-431.693			-308.692
1939	-429.646	-221.166	-434.548			-308.657
1940	-430.113	-218.188	-441.407			-308.623
1941	-425.884	-219.975	-442.017			-308.866
1942	-437.485	-220.583	-442.811			-309.62
1943	-434.204	-215.953	-439.827			-310.373
1944	-428.042	-220.377	-413.433			-311.127
1945	-434.569	-217.901				-310.983
1946	-437.788	-227.445				-310.356
1947	-435.527	-206.604				-309.73
1948	-436.259	-223.876				-309.104
1949	-434.766	-210.971				-314.264
1950	-437.135	-213.585				-319.554
1951	-442.109	-214.581				-324.843
1952	-443.043	-222.565				-326.314
1953	-445.733	-226.658				-320.276
1954	-453.054	-218.323				-314.237
1955	-450.386	-212.282				-308.198
1956	-451.51	-217.636				-309.811
1957	-445.237	-224.565				-314.297
1958	-446.785	-229.425				-318.782
1959	-445	-223.169				-321.478
1960	-440.311	-223.386				-314.451
1961	-447.768	-215.762				-307.425
1962	-445.686	-217.399				-300.398
1963	-445.443	-222.317				-302.297
1964	-446.113	-222.095				-309.119
1965	-444.428	-224.821				-315.942
1966	-441.088	-211.279				-320.075
1967	-444.413	-200.559				-314.189
1968	-444.085	-212.652				-308.303
1969	-438.669	-219.791				-302.417
1970	-433.522	-228.458				-305.923
1971	-431.212	-220.5				-310.987
1972	-430.16	-223.011				-316.051
1973	-435.211	-232.713				-317.365
1974	-436.186	-219.499				-316.004
1975	-434.065	-221.463				-314.642
1976	-429.257	-234.989		-334.503		-314.687
1977	-440.17	-223.252		-314.311		-316.942
1978	-440.614	-207.421		-323.788	-423.598	-319.196
1979	-444.863	-218.515		-334.301	-412.645	-320.312
1980	-441.651	-216.695		-299.766	-432.544	-318.43
1981	-442.172	-215.076		-311.454	-419.035	-316.547
1982	-438.008	-222.551		-342.108	-423.414	-315.057
1983	-437.62	-198.019		-335.561	-439.264	-314.796
1984	-432.715	-210.402		-342.019	-441.977	-314.535
1985	-431.858	-205.614		-324.713	-429.606	-313.585
1986	-437.762	-215.459		-320.653	-426.538	-310.936
1987	-446.275	-206.967		-338.332	-435.032	-308.287
1988	-440.167			-320.986	-430.693
1989	-433.976			-292.063	-432.455
1990	-434.067			-332.145	-427.809
1991	-431.368			-347.405	-413.274
1992	-433.801			-337.111	-411.769
1993	-441.82			-326.249	-426.423
1994	-440.311			-342.115	-415.446
1995	-439.898			-318.101	-405.888
1996	-440.259			-361.28	-421.497
1997	-434.135			-374.718	-420.333
1998	-430.81			-332.757	-412.841
1999	-423.966			-308.092	-420.403
2000	-439.933			-296.943	-430.485
2001	-455.489			-299.83	-424.132
2002	-430.566			-319.079	-418.07
2003	-432.444			-351.528	-402.975
2004	-437.707			-364.16	-434.783
2005	-436.278			-317.266	-435.602
2006	-430.179			-324.504	-443.329
2007	-453.443			-335.347	-437.752
2008	-446.929			-316.133	-431.412
2009	-414.801			-316.213	-426.296
2010	-438.357

## Sheet: PEL2016
Year AD	Temperature anomaly, *C				Temperature anomaly (relative to period 1980-2009) for the period 1654-2009 reconstructed for the Princess Elisabeth Land ('PEL2016')
					See Figure 5b in the paper
1654	-1.02881
1655	-1.05508
1656	-1.07774
1657	-1.09484
1658	-1.10612
1659	-1.11152
1660	-1.11115
1661	-1.10534
1662	-1.09461
1663	-1.07965
1664	-1.06133
1665	-1.04066
1666	-1.01874
1667	-0.996786
1668	-0.97602
1669	-0.957677
1670	-0.942944
1671	-0.932916
1672	-0.928555
1673	-0.930648
1674	-0.939772
1675	-0.956264
1676	-0.980192
1677	-1.01135
1678	-1.04922
1679	-1.09304
1680	-1.14175
1681	-1.19402
1682	-1.24835
1683	-1.30302
1684	-1.35622
1685	-1.40604
1686	-1.45057
1687	-1.48798
1688	-1.51651
1689	-1.53461
1690	-1.54098
1691	-1.53459
1692	-1.51475
1693	-1.48117
1694	-1.43391
1695	-1.37349
1696	-1.3008
1697	-1.21712
1698	-1.12411
1699	-1.02373
1700	-0.918196
1701	-0.809935
1702	-0.701493
1703	-0.595462
1704	-0.494398
1705	-0.400743
1706	-0.31674
1707	-0.244365
1708	-0.185261
1709	-0.140677
1710	-0.153914
1711	-0.178575
1712	-0.211956
1713	-0.208643
1714	-0.212336
1715	-0.222553
1716	-0.23866
1717	-0.259872
1718	-0.285269
1719	-0.313806
1720	-0.344337
1721	-0.37564
1722	-0.406451
1723	-0.435496
1724	-0.461532
1725	-0.483388
1726	-0.50001
1727	-0.510496
1728	-0.514141
1729	-0.510468
1730	-0.499254
1731	-0.480554
1732	-0.454706
1733	-0.422336
1734	-0.384345
1735	-0.341885
1736	-0.296331
1737	-0.249234
1738	-0.202271
1739	-0.15719
1740	-0.115743
1741	-0.0796221
1742	-0.0503969
1743	-0.0294499
1744	-0.0179219
1745	-0.016664
1746	-0.0261998
1747	-0.0467001
1748	-0.0779711
1749	-0.119457
1750	-0.170255
1751	-0.229149
1752	-0.29465
1753	-0.365054
1754	-0.438502
1755	-0.51305
1756	-0.575759
1757	-0.630151
1758	-0.675588
1759	-0.722763
1760	-0.766312
1761	-0.805507
1762	-0.839796
1763	-0.868826
1764	-0.892444
1765	-0.9107
1766	-0.923832
1767	-0.932247
1768	-0.936492
1769	-0.937221
1770	-0.935155
1771	-0.931042
1772	-0.925619
1773	-0.919572
1774	-0.913502
1775	-0.907895
1776	-0.903109
1777	-0.899355
1778	-0.896697
1779	-0.89506
1780	-0.894245
1781	-0.893949
1782	-0.8938
1783	-0.893389
1784	-0.892307
1785	-0.89018
1786	-0.886709
1787	-0.881697
1788	-0.875077
1789	-0.866926
1790	-0.857473
1791	-0.847099
1792	-0.836318
1793	-0.825761
1794	-0.81614
1795	-0.808206
1796	-0.802707
1797	-0.800339
1798	-0.801691
1799	-0.807206
1800	-0.817131
1801	-0.831484
1802	-0.850032
1803	-0.872275
1804	-0.897448
1805	-0.924535
1806	-0.952299
1807	-0.979326
1808	-1.00408
1809	-1.02496
1810	-1.04038
1811	-1.04887
1812	-1.04911
1813	-1.04003
1814	-1.02087
1815	-0.991267
1816	-0.951252
1817	-0.901316
1818	-0.8424
1819	-0.775893
1820	-0.703599
1821	-0.627684
1822	-0.550607
1823	-0.475034
1824	-0.403738
1825	-0.339494
1826	-0.284959
1827	-0.242562
1828	-0.214395
1829	-0.202111
1830	-0.206842
1831	-0.22913
1832	-0.268884
1833	-0.325357
1834	-0.397154
1835	-0.482264
1836	-0.57812
1837	-0.681675
1838	-0.789516
1839	-0.897976
1840	-1.00327
1841	-1.10165
1842	-1.18953
1843	-1.26362
1844	-1.3211
1845	-1.35966
1846	-1.37769
1847	-1.37424
1848	-1.34916
1849	-1.30306
1850	-1.23728
1851	-1.15389
1852	-1.05558
1853	-0.945551
1854	-0.82743
1855	-0.705093
1856	-0.582534
1857	-0.463709
1858	-0.35238
1859	-0.251978
1860	-0.165467
1861	-0.0952372
1862	-0.0430191
1863	-0.00982481
1864	0.00408018
1865	-0.000825106
1866	-0.0233505
1867	-0.0616567
1868	-0.113344
1869	-0.175561
1870	-0.245135
1871	-0.318711
1872	-0.392896
1873	-0.464403
1874	-0.530192
1875	-0.587592
1876	-0.634408
1877	-0.66901
1878	-0.690386
1879	-0.698177
1880	-0.692675
1881	-0.674798
1882	-0.646035
1883	-0.608365
1884	-0.564159
1885	-0.516062
1886	-0.466866
1887	-0.419379
1888	-0.376293
1889	-0.340061
1890	-0.312785
1891	-0.296119
1892	-0.291199
1893	-0.29859
1894	-0.318269
1895	-0.349621
1896	-0.391478
1897	-0.442165
1898	-0.499588
1899	-0.561319
1900	-0.624715
1901	-0.687028
1902	-0.745534
1903	-0.797648
1904	-0.841035
1905	-0.873714
1906	-0.894139
1907	-0.90126
1908	-0.894567
1909	-0.874104
1910	-0.840459
1911	-0.794736
1912	-0.738497
1913	-0.673692
1914	-0.60257
1915	-0.527578
1916	-0.451254
1917	-0.376123
1918	-0.304587
1919	-0.238834
1920	-0.180748
1921	-0.131842
1922	-0.0932087
1923	-0.0654873
1924	-0.0488563
1925	-0.043044
1926	-0.0473604
1927	-0.0607466
1928	-0.0818397
1929	-0.109048
1930	-0.140637
1931	-0.174814
1932	-0.209817
1933	-0.243997
1934	-0.275889
1935	-0.304275
1936	-0.328229
1937	-0.347152
1938	-0.360778
1939	-0.369172
1940	-0.372712
1941	-0.372043
1942	-0.368037
1943	-0.361725
1944	-0.289439
1945	-0.221651
1946	-0.160532
1947	-0.172619
1948	-0.18985
1949	-0.21189
1950	-0.238174
1951	-0.267929
1952	-0.300197
1953	-0.333874
1954	-0.367751
1955	-0.400566
1956	-0.431051
1957	-0.45799
1958	-0.480269
1959	-0.49692
1960	-0.507167
1961	-0.510457
1962	-0.506487
1963	-0.495214
1964	-0.476862
1965	-0.451913
1966	-0.421087
1967	-0.385314
1968	-0.345697
1969	-0.303471
1970	-0.259946
1971	-0.216466
1972	-0.174348
1973	-0.134837
1974	-0.0990571
1975	-0.0386441
1976	0.0153268
1977	0.0125139
1978	-0.0302667
1979	-0.0809871
1980	-0.0878787
1981	-0.0952512
1982	-0.102669
1983	-0.109724
1984	-0.116055
1985	-0.121366
1986	-0.125445
1987	-0.110617
1988	-0.0881403
1989	-0.0571661
1990	-0.034742
1991	-0.00944669
1992	0.0175651
1993	0.0450226
1994	0.071595
1995	0.095951
1996	0.116817
1997	0.133038
1998	0.143624
1999	0.147804
2000	0.145057
2001	0.135139
2002	0.118098
2003	0.0942789
2004	0.0643055
2005	0.0290628
2006	-0.0103394
2007	-0.0526115
2008	-0.0963361
2009	-0.140542

## Sheet: PEL temperature anomaly
Year AD	Temperature anomaly, *C				Mean temperature anomaly (relative to 1980-2009 period) for the Princess Elisabeth Land (average anomaly at Davis, Mirny and Vostok stations)
					See Figure 5b in the paper
1958	-0.310348
1959	-0.345031
1960	-0.370513
1961	-0.386265
1962	-0.392113
1963	-0.388237
1964	-0.375164
1965	-0.353738
1966	-0.325093
1967	-0.290597
1968	-0.251805
1969	-0.210392
1970	-0.168087
1971	-0.12661
1972	-0.087598
1973	-0.0525477
1974	-0.0227544
1975	0.000735814
1976	0.0171658
1977	0.0260946
1978	0.0274131
1979	0.0213457
1980	0.00843887
1981	-0.0104626
1982	-0.0342515
1983	-0.0616043
1984	-0.0910364
1985	-0.120963
1986	-0.149764
1987	-0.175851
1988	-0.197734
1989	-0.214083
1990	-0.223782
1991	-0.225978
1992	-0.220119
1993	-0.205979
1994	-0.183671
1995	-0.153647
1996	-0.116684
1997	-0.0738582
1998	-0.0265079
1999	0.0238169
2000	0.0754101
2001	0.126474
2002	0.175184
2003	0.219761
2004	0.258537
2005	0.290017
2006	0.312942
2007	0.326331
2008	0.329524
2009	0.322208
2010	0.304429
2011	0.276597
2012	0.239467
2013	0.194118
2014	0.141911
2015	0.084443
