# Supplementary material for: Climatic variability in Princess Elizabeth Land (East Antarctica) overthe last 350 years
Source: Copernicus journal article supplement (doi:10.5194/cp-2016-76), 2016-07-08
Supplement: Supplementary file 3 [file Supplementary materials for PEL paper.doc]

Supplementary materials for paper “Climatic variability in the Princess Elizabeth Land (East Antarctica) over the last 350 years”


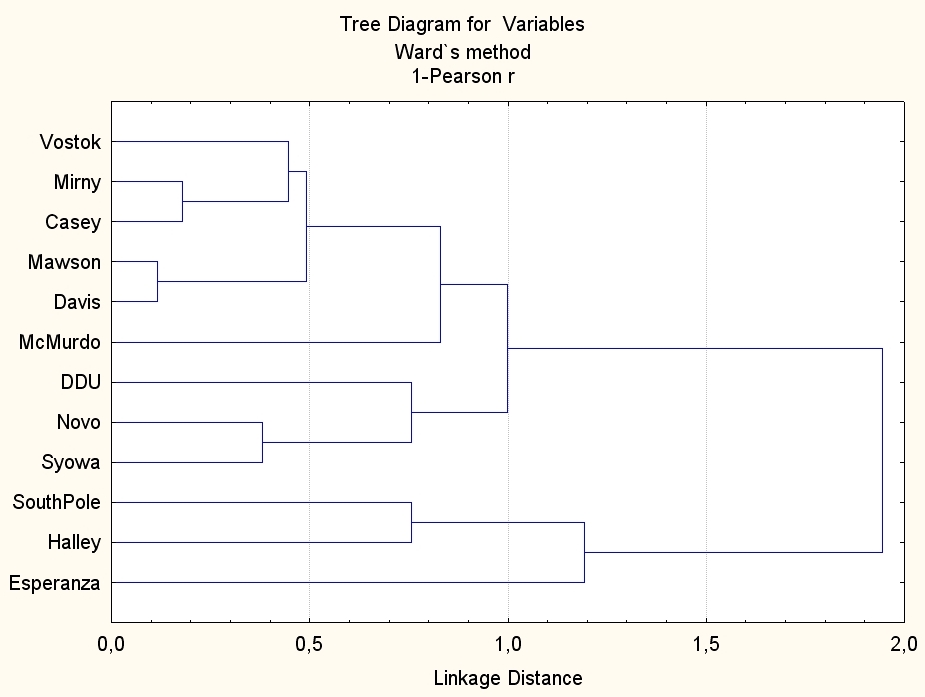


Figure S1. Cluster analysis of air temperature series from 12 Antarctic stations.

DDU = Dumont d’Urville, Novo = Novolazarevskaya.

Figure S2. Surface air temperature records at 12 Antarctic stations processed with a low-pass filter (all variability with period <27 years are filtered out).


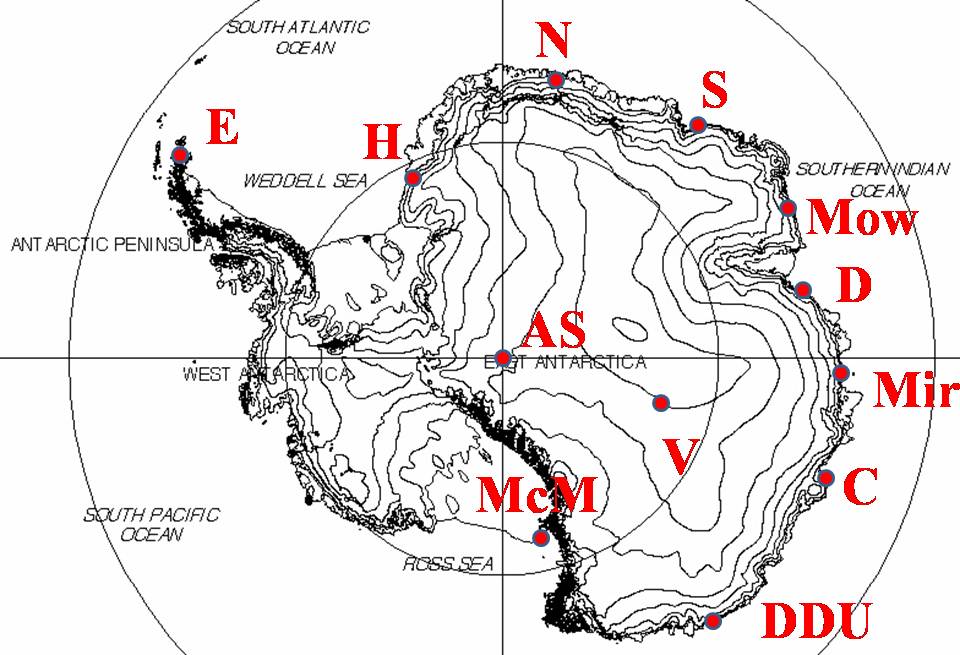


Figure S3. Location of stations shown in Fig. S2.

V = Vostok, AS = Amundsen-Scott (South Pole), Mir = Mirny, D = Davis, Mow = Mowson, S = Syowa, N = Novolazarevskaya, H = Halley, E = Esperanza, McM = Mac Murdo, DDU = Dumont d’Hurville, C = Casey.
